# Supplementary material
Source: PubMed Central journal article supplement (PMC4892971)
Supplement: NIHMS779554-supplement-supplement_1.pdf [file NIHMS779554-supplement-supplement_1.pdf]

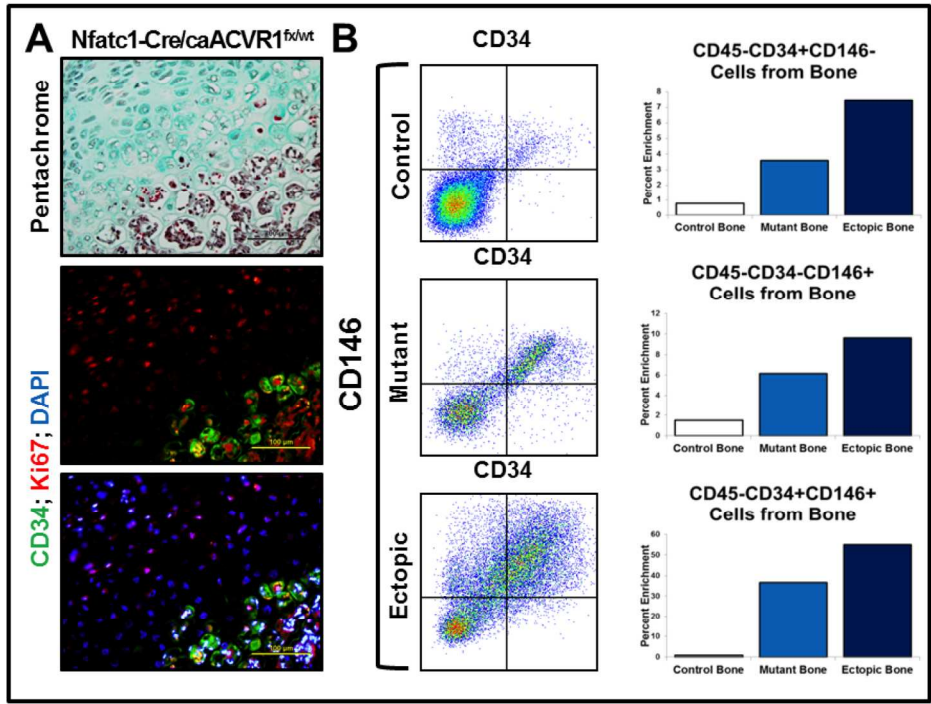

Supplemental Figure 1. Pericytes are present in the HO of mutant mice. (A) Immunostaining for CD34 and Ki67 in the HO of mutant mice (*Nfatc1-cre/caACVR1fl/wt*); (B) Flow cytometry showing presence of pericytes in ectopic bone.  
1057x792mm (72 x 72 DPI)

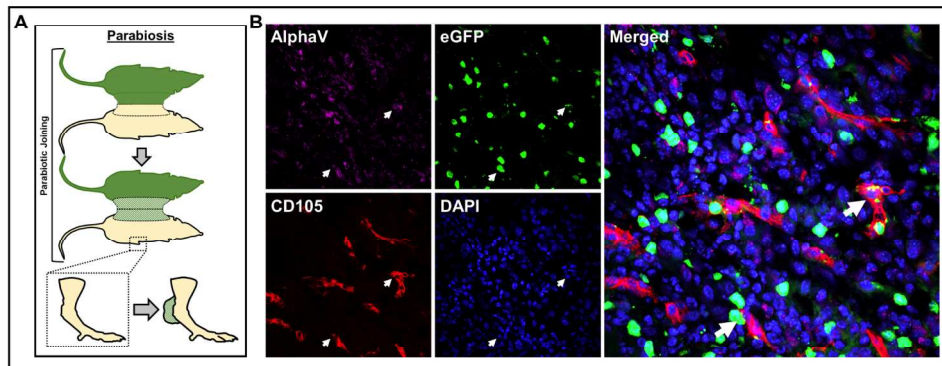

Supplemental Figure 2. Parabiosis model shows BCSPs from a systemic source. (A) Parabiosis mouse model; (B) Rare presence of parabiont-derived GFP+ BCSPs in the site of HO in parabiotic model with expression of AlphaV and CD105 in histologic region devoid of hematopoietic structures.  
1057x793mm (72 x 72 DPI)
